# Supplementary material for: Selective activation of Gs signaling in adipocytes causes striking metabolic improvements in mice
Source: PubMed Central journal article supplement (PMC6717953; doi:10.1016/j.molmet.2019.06.018), 2019-06-20
Supplement: mmc1.pdf [file mmc1.pdf]

SUPPLEMENTAL MATERIAL:

**Selective activation of G<sub>s</sub> signaling in adipocytes causes striking metabolic improvements in mice**

Lei Wang, Sai P. Pydi, Yinghong Cui, Lu Zhu, Jaroslawna Meister, Oksana Gavrilova, Rebecca Berdeaux, Jean-Philippe Fortin, Kendra K Bence, Cecile Vernochet, Jürgen Wess

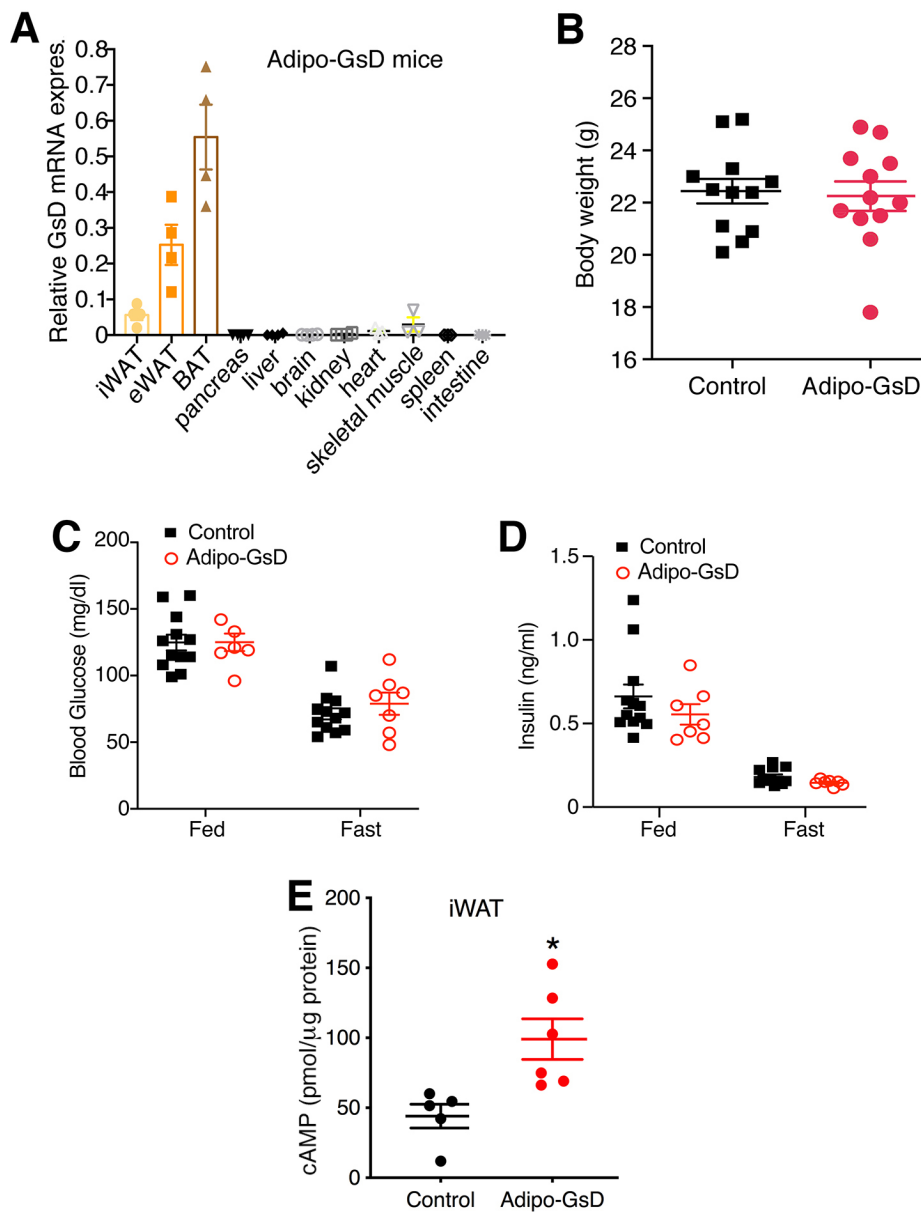

**Supplemental Figure 1.** Adipo-GsD mice exclusively express GsD in adipose tissues and show unchanged body weight, blood glucose, and plasma insulin levels. (A) Relative GsD mRNA expression levels in different tissues of adipo-GsD mice detected by Taqman qPCR (n=4). (B) Body weight of adipo-GsD mice and control littermates (males) maintained on regular chow (RC) for 8 weeks (n=12 per group). Blood glucose (C) and plasma insulin (D) levels (fed and fasted) of adipo-GsD mice and control littermates (males) maintained on RC for 8 weeks (control, n=12; adipo-GsD, n=7). (E) CNO-induced increase in cAMP levels in iWAT of adipo-GsD mice. Male adipo-GsD mice and control littermates maintained on RC were injected with CNO (10 mg/kg i.p.). Fifteen min later, mice were euthanized and iWAT cAMP levels were determined (n=6 per group). Data are given as means $\pm$ s.e.m. Statistical significance was assessed by two-tailed Student's t test. \* $P$ <0.05, vs. control.

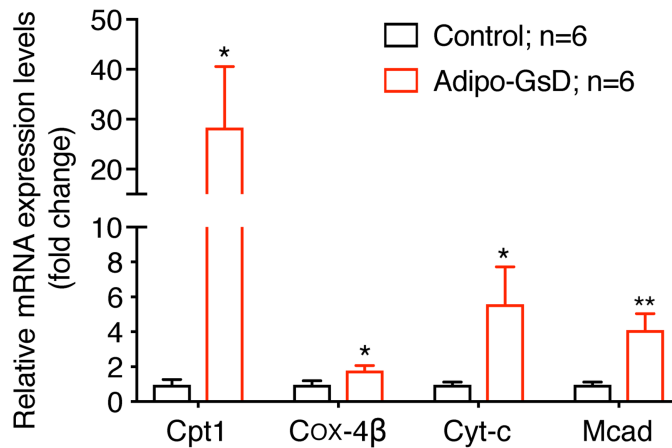

**Supplemental Figure 2.** Chronic activation of adipocyte  $G_s$  signaling promotes the expression of key genes involved in mitochondrial function. iWAT was prepared from male adipo-GsD and control mice that had been maintained on a HFD for 8 weeks and had received daily injections of CNO (10 mg/kg i.p.) during the last 4 weeks of HFD feeding. The expression levels of the indicated genes were studied by qRT-PCR. Cpt1, carnitine palmitoyltransferase 1; Cox-4 $\beta$ , cytochrome c oxidase subunit 4 $\beta$ ; Cyt-c, mitochondrial cytochrome c; Mcad, medium-chain acyl-CoA dehydrogenase. Data represent mean $\pm$ s.e.m. Statistical significance was assessed by two-tailed Student's t test. \* $P$ <0.05, \*\* $P$ <0.01, vs. control.

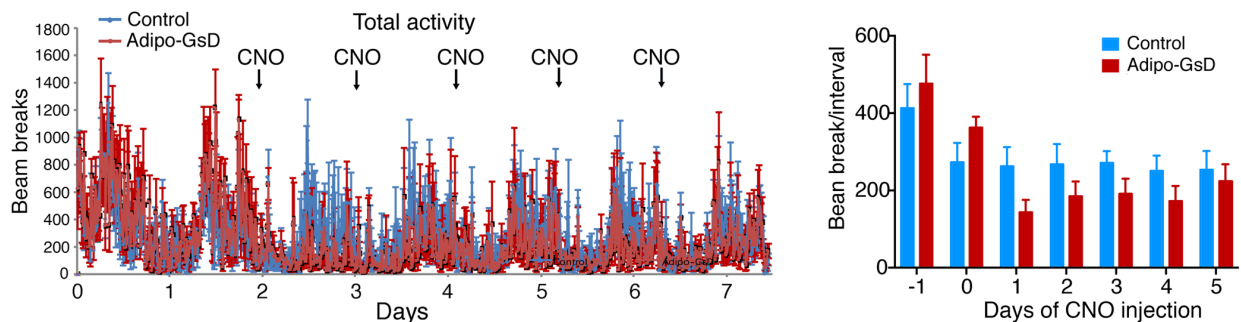

**Supplemental Figure 3.** Total locomotor activity is not significantly affected by chronic CNO treatment of HFD adipo-GsD mice. Locomotor activity measurements were carried out with male adipo-GsD and control mice that had been maintained on a HFD for 8 weeks and had received daily injections of CNO (10 mg/kg i.p.) during the last week of HFD feeding. Data represent mean $\pm$  s.e.m. (control, n=6; adipo-GsD, n=5).

**Supplemental Table 1.** List of primers/probes used for gene expression analysis

| Gene Target    | Species | Primer sequence                                                                                                                                                     |
|----------------|---------|---------------------------------------------------------------------------------------------------------------------------------------------------------------------|
| GsD            | mouse   | Probe: 5'-/56-FAM/TTCTCCTCA/ZEN/AACGACACCTCCAGC/3IABkFQ/-3'<br>Primer 1: 5'-GTTGGGCAGCTACAACATTTTC-3'<br>Primer 2: 5'-ATGCCAGGAAGCCAGTTAAG-3' (for Taqman analysis) |
| $\beta$ -actin | mouse   | Probe: 5'-/56-FAM/TGGCATTGT/ZEN/TACCAACTGGGACGA/3IABkFQ/-3'<br>Primer 1: 5'-GAGGTATCCTGACCCTGAAGTA-3'<br>Primer 2: 5'-CACACGCAGCTCATTGTAGA-3' (for Taqman analysis) |
| $\beta$ -actin | mouse   | Forward: 5'-GATATCGCTGCGCTGGTCGTC-3'<br>Reverse: 5'-ACGCAGCTCATTGTAGAAGGTGTGG-3'<br>(for SYBR Green analysis)                                                       |
| Ucp-1          | mouse   | Forward: 5'-ACTGCCACACCTCCAGTCATT-3'<br>Reverse: 5'-CTTTGCCTCACTCAGGATTGG-3'                                                                                        |
| 18S rRNA       | mouse   | Forward: 5'-CGGCTACCACATCCAAGGAA-3'<br>Reverse: 5'-GCTGGAATTACCGCGGCT-3'                                                                                            |
| Cidea          | mouse   | Forward: 5'-TGCTCTTCTGTATCGCCAGT-3'<br>Reverse: 5'-GCCGTGTTAAGGAATCTG CTG-3'                                                                                        |
| Serca2b        | mouse   | Forward: 5'-ACCTTTGCCGCTCATTTTCC-3'<br>Reverse: 5'-GCTGCACACACTCTTTACCG-3'                                                                                          |
| Tbx1           | mouse   | Forward: 5'-GGCAGGCAGACGAATGTTC-3'<br>Reverse: 5'-GCCGTGTTAAGGAATCTG CTG-3'                                                                                         |
| Prdm16         | mouse   | Forward: 5'-CAGCACGGTGAAGCCATTC-3'<br>Reverse: 5'-GCCGTGTTAAGGAATCTG CTG-3'                                                                                         |
| Pgc-1a         | mouse   | Forward: 5'-AGCCGTGACCACTGACAAC GAG-3'<br>Reverse: 5'-GCTGCATGGTTCTGAGTGCTAAG-3'                                                                                    |
| CKmt2          | mouse   | Forward: 5'-GCATGGTGGCTGGTGATGAG-3'<br>Reverse: 5'-AAACTGCCCGTGAGTAATCTT G-3'                                                                                       |
| Espt1          | mouse   | Forward: 5'-ACCCTGATAGCACCAAACGA-3'<br>Reverse: 5'-AGGTCTGCCAGTTCTTGCTC-3'                                                                                          |
| Tmem26         | mouse   | Forward: 5'-ACCCTGTCATCCCACAGAG-3'<br>Reverse: 5'-TGTTTGGTGGAGTCCTAAFFTC-3'                                                                                         |
| Cpt1           | mouse   | Forward: 5'- TTGCCCTACAGCTCTGGCATTTC-3'<br>Reverse: 5'- GCACCCAGATGATTGGGATACTGT-3'                                                                                 |
| Cox4 $\beta$   | mouse   | Forward: 5'- CTGCCCCGAGTCTGGTAATG-3'<br>Reverse: 5'- CAGTCAACGTAGGGGGTCATC-3'                                                                                       |
| CytC           | mouse   | Forward: 5'- AAATCTCCACGGTCTGTTCGG-3'<br>Reverse: 5'- GGGTATCCTCTCCCAGGTG-3'                                                                                        |
| Mcad           | mouse   | Forward: 5'- ATGACGGAGCAGCCAATGAT-3'<br>Reverse: 5'- TCGTCACCCTTCTTCTGCTT-3'                                                                                        |

**Supplemental Table 2.** RNA-seq analysis of the expression of G<sub>s</sub>-linked GPCRs expressed in mouse inguinal white adipocytes (iWAT), epididymal white adipocytes (eWAT), and brown adipose tissue (BAT)

| GPCR      | Full name                                                  | G protein coupling profile                       | Reads Per Kilobase of transcript, per Million mapped reads (RPKM) |
|-----------|------------------------------------------------------------|--------------------------------------------------|-------------------------------------------------------------------|
| Adcyap1r1 | adenylate cyclase activating polypeptide 1 receptor type 1 | G <sub>s</sub> , G <sub>q</sub> /G <sub>11</sub> | iWAT (1.083), eWAT (3.009), BAT (0.926)                           |
| Adora2a   | adenosine receptor A2a                                     | G <sub>s</sub> , G <sub>q</sub> /G <sub>11</sub> | iWAT (2.602), eWAT (3.666), BAT (3.872)                           |
| Adora2b   | adenosine receptor A2b                                     | G <sub>s</sub> , G <sub>q</sub> /G <sub>11</sub> | iWAT (0.230), eWAT (0.656), BAT (0.030)                           |
| Adrb1     | adrenergic receptor, beta 1                                | G <sub>s</sub> , G <sub>i</sub>                  | iWAT (1.309), eWAT (0.701), BAT (8.282)                           |
| Adrb2     | adrenergic receptor, beta 2                                | G <sub>s</sub> , G <sub>i</sub>                  | iWAT (2.200), eWAT (2.734), BAT (1.325)                           |
| Adrb3     | adrenergic receptor, beta 3                                | G <sub>s</sub> , G <sub>i</sub>                  | iWAT (93.89), eWAT (147.456), BAT (71.26)                         |
| Avpr2     | arginine vasopressin receptor 2                            | G <sub>s</sub>                                   | iWAT (0.105), eWAT (0.126), BAT (0.137)                           |
| Drd1a     | dopamine receptor D1                                       | G <sub>s</sub>                                   | iWAT (0.294), eWAT (1.083), BAT (0.017)                           |
| Fzd3      | frizzled class receptor 3                                  | G <sub>s</sub>                                   | iWAT (0.711), eWAT (0.696), BAT (0.129)                           |
| Gcgr      | glucagon receptor                                          | G <sub>s</sub>                                   | iWAT (0.081), eWAT (0.230), BAT (0.033)                           |
| Gipr      | gastric inhibitory polypeptide receptor                    | G <sub>s</sub>                                   | iWAT (0.275), eWAT (0.566), BAT (0.426)                           |
| Gpr133    | adhesion G protein-coupled receptor D1                     | G <sub>s</sub>                                   | iWAT (0.162), eWAT (0.379), BAT (0.177)                           |
| Gpr3      | G protein-coupled receptor 3                               | G <sub>s</sub>                                   | iWAT (0.055), eWAT (0.050), BAT (0.011)                           |
| Gpr65     | G protein-coupled receptor 65                              | G <sub>s</sub>                                   | iWAT (0.257), eWAT (1.313), BAT (0.603)                           |
| Htr7      | 5-hydroxytryptamine (serotonin) receptor 7                 | G <sub>s</sub>                                   | iWAT (0.015), eWAT (0.051), BAT (0.028)                           |
| Mc1r      | melanocortin 1 receptor                                    | G <sub>s</sub>                                   | iWAT (0.022), eWAT (0.014), BAT (0.006)                           |
| Mc2r      | melanocortin 2 receptor                                    | G <sub>s</sub>                                   | iWAT (8.250), eWAT (9.427), BAT (0.607)                           |
| Mc5r      | melanocortin 5 receptor                                    | G <sub>s</sub>                                   | iWAT (0.389), eWAT (0.173), BAT (0.416)                           |
| Ptger2    | prostaglandin E receptor 2 (subtype EP2)                   | G <sub>s</sub>                                   | iWAT (0.111), eWAT (0.276), BAT (0.232)                           |
| Ptger4    | prostaglandin E receptor 4 (subtype EP4)                   | G <sub>s</sub> , G <sub>i</sub>                  | iWAT (1.880), eWAT (2.831), BAT (0.839)                           |
| Pth1r     | Parathyroid hormone 1 receptor                             | G <sub>s</sub> , G <sub>q</sub> /G <sub>11</sub> | iWAT (2.479), eWAT (2.830), BAT (7.983)                           |
| Tshr      | thyroid stimulating hormone receptor                       | G <sub>s</sub> , G <sub>q</sub> /G <sub>11</sub> | iWAT (34.19), eWAT (36.89), BAT (2.395)                           |
| Vipr1     | vasoactive intestinal peptide receptor 1                   | G <sub>s</sub>                                   | iWAT (0.010), eWAT (0.042), BAT (0.010)                           |
| Vipr2     | vasoactive intestinal peptide receptor 2                   | G <sub>s</sub>                                   | iWAT (0.076), eWAT (0.182), BAT (0.124)                           |

Adipocytes/BAT were isolated from 16-week-old male C57BL/6J mice consuming regular chow (n=6). RPKM data are given as mean values (n=6).
